# Supplementary material for: Diagnostic Performance of Deep Learning Models in Detecting Diabetic Retinopathy: A Systematic Review and Meta-Analysis of Clinical Studies
Source: Research Square preprint supplement (doi:10.21203/rs.3.rs-7179215/v1), 2025-07-28

**Supplementary Materials for the Paper titled: "Diagnostic Performance of Deep Learning Models for Diabetic Retinopathy: A Systematic Review and Meta-Analysis of Clinical Studies**

**Supplementary Figure S1**: Sensitivity and Specificity by Model Type: Ensemble Models vs. Standard CNNs


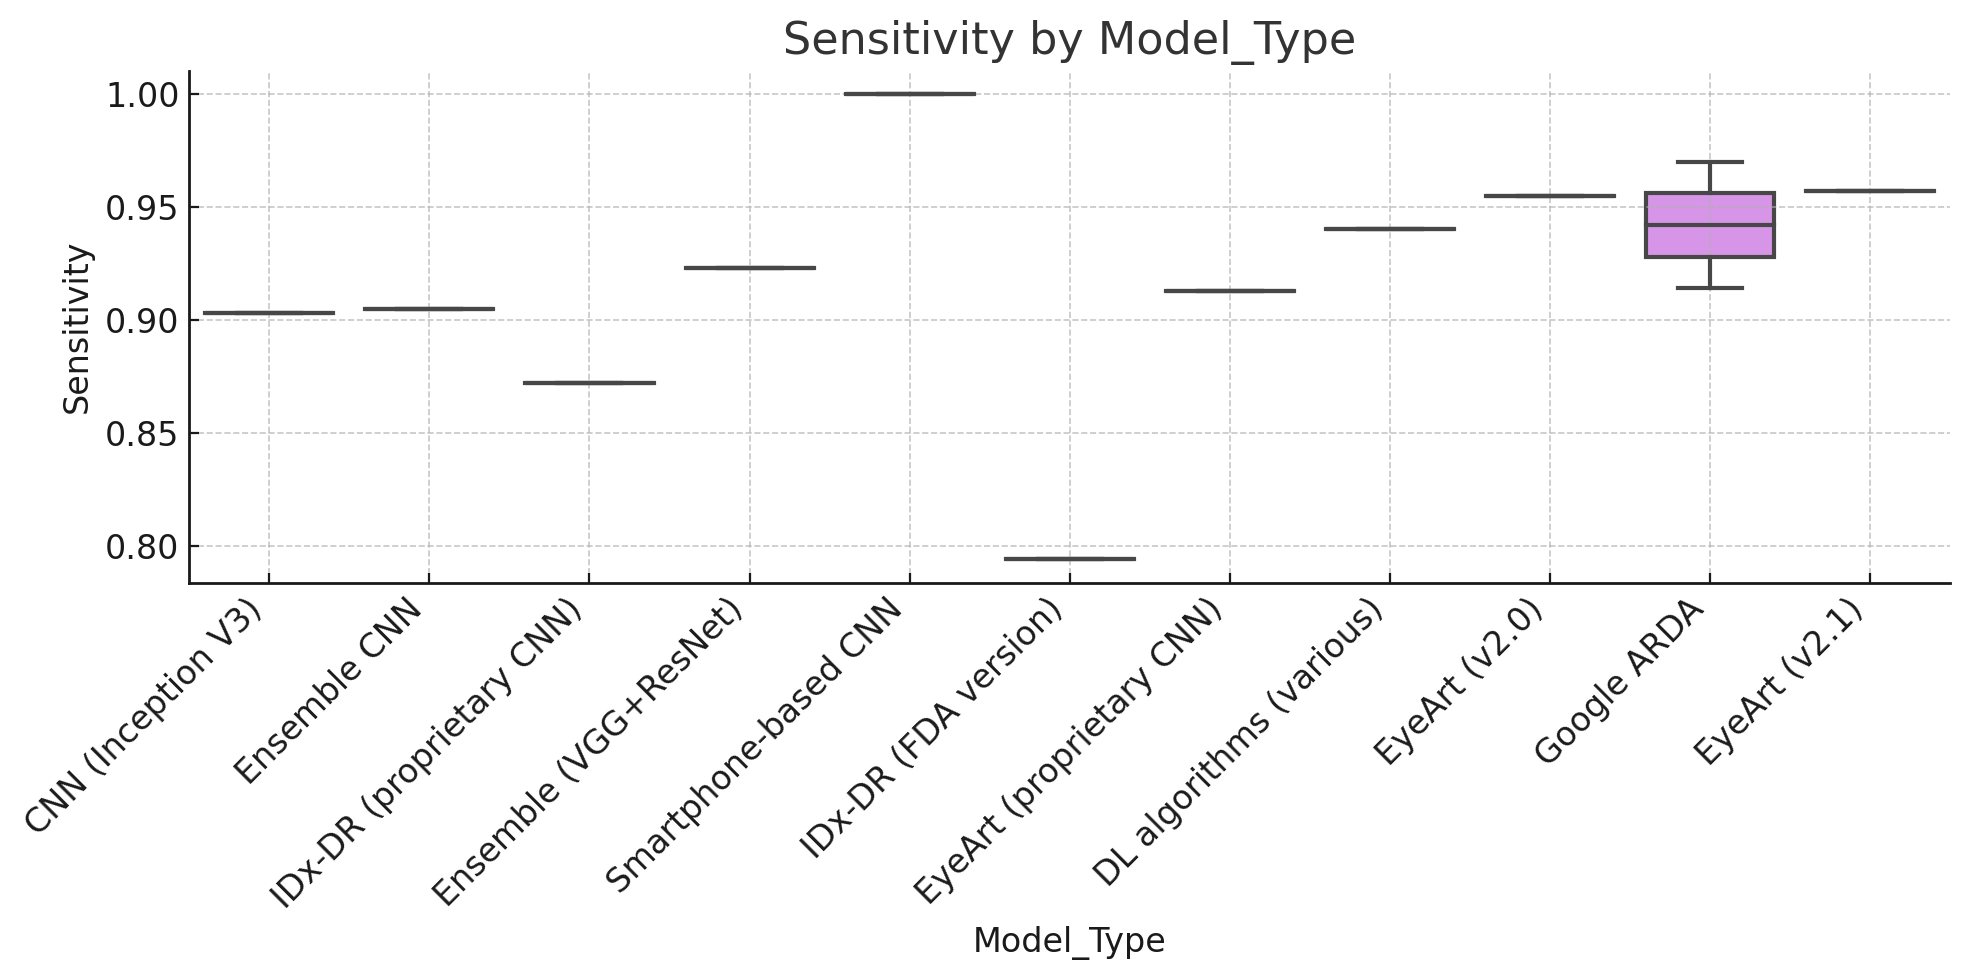


**Supplementary Figure S2**: Sensitivity and Specificity by Validation Type: External/Prospective vs. Internal


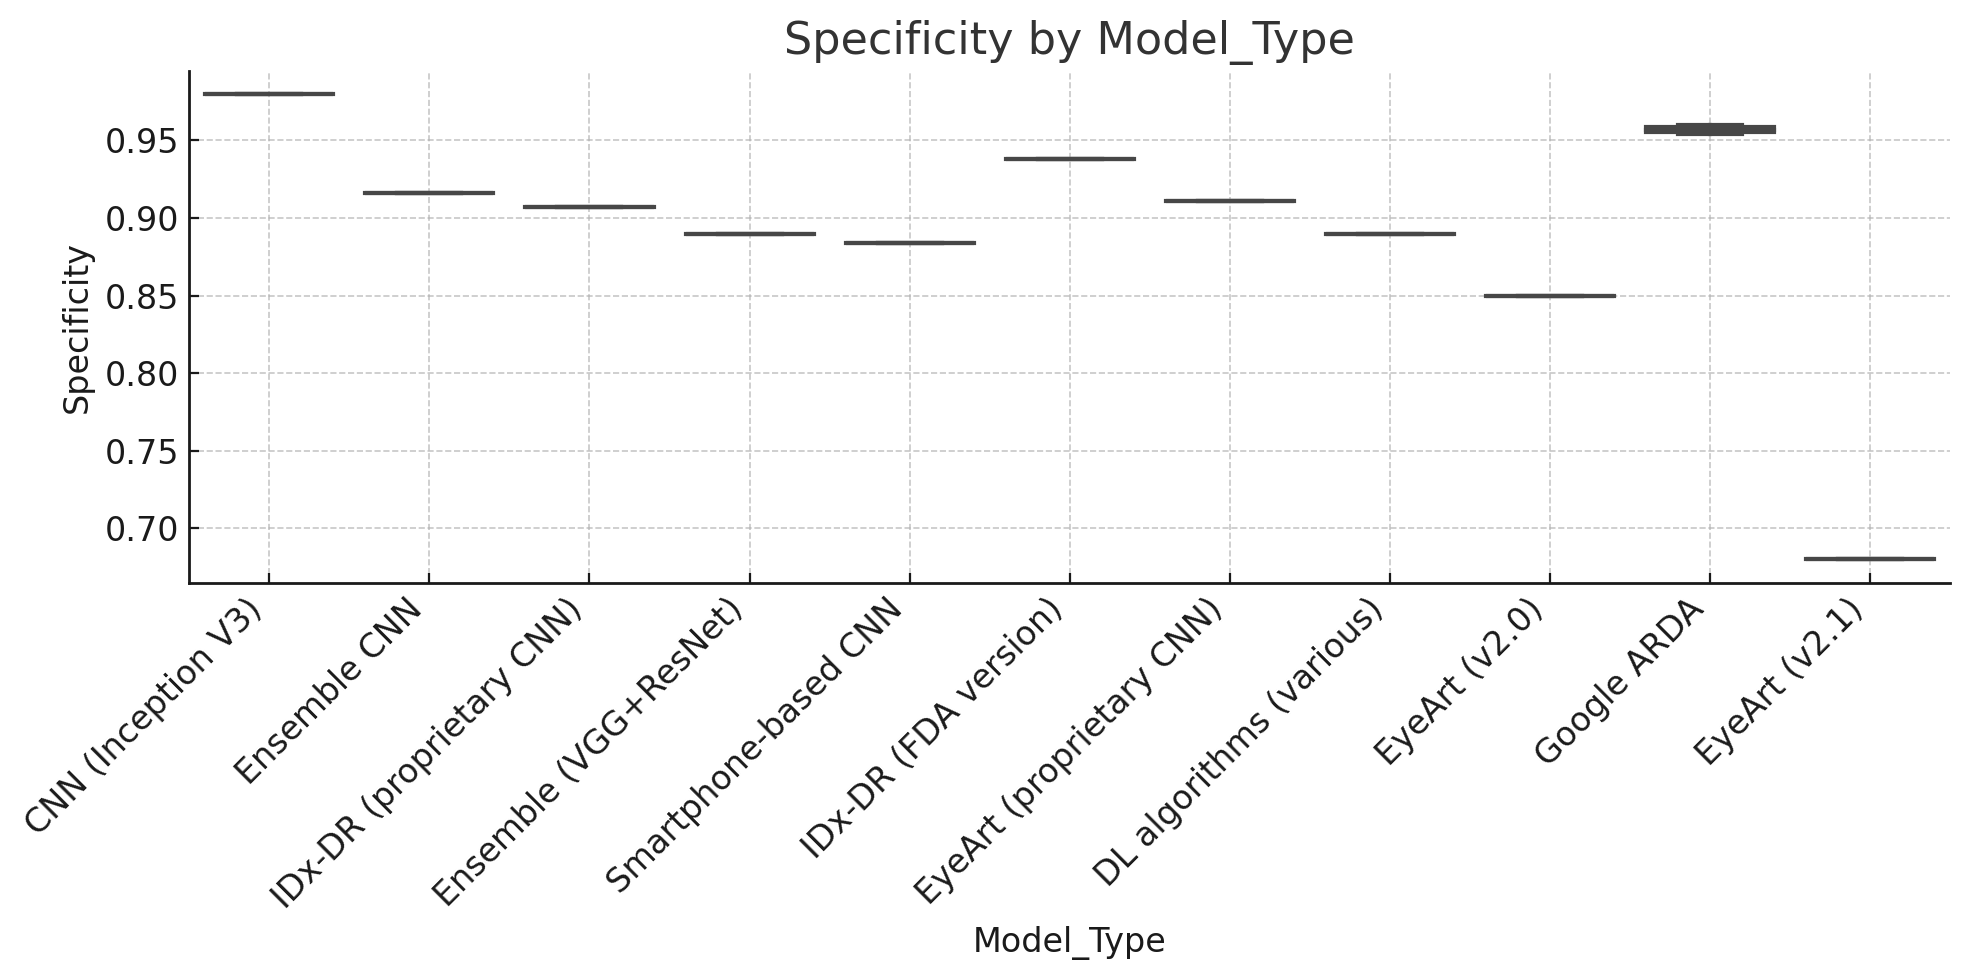


**Supplementary Figure S3**: Sensitivity by Geography (Country): Comparison of High-Income vs. Low-Middle Income Countries


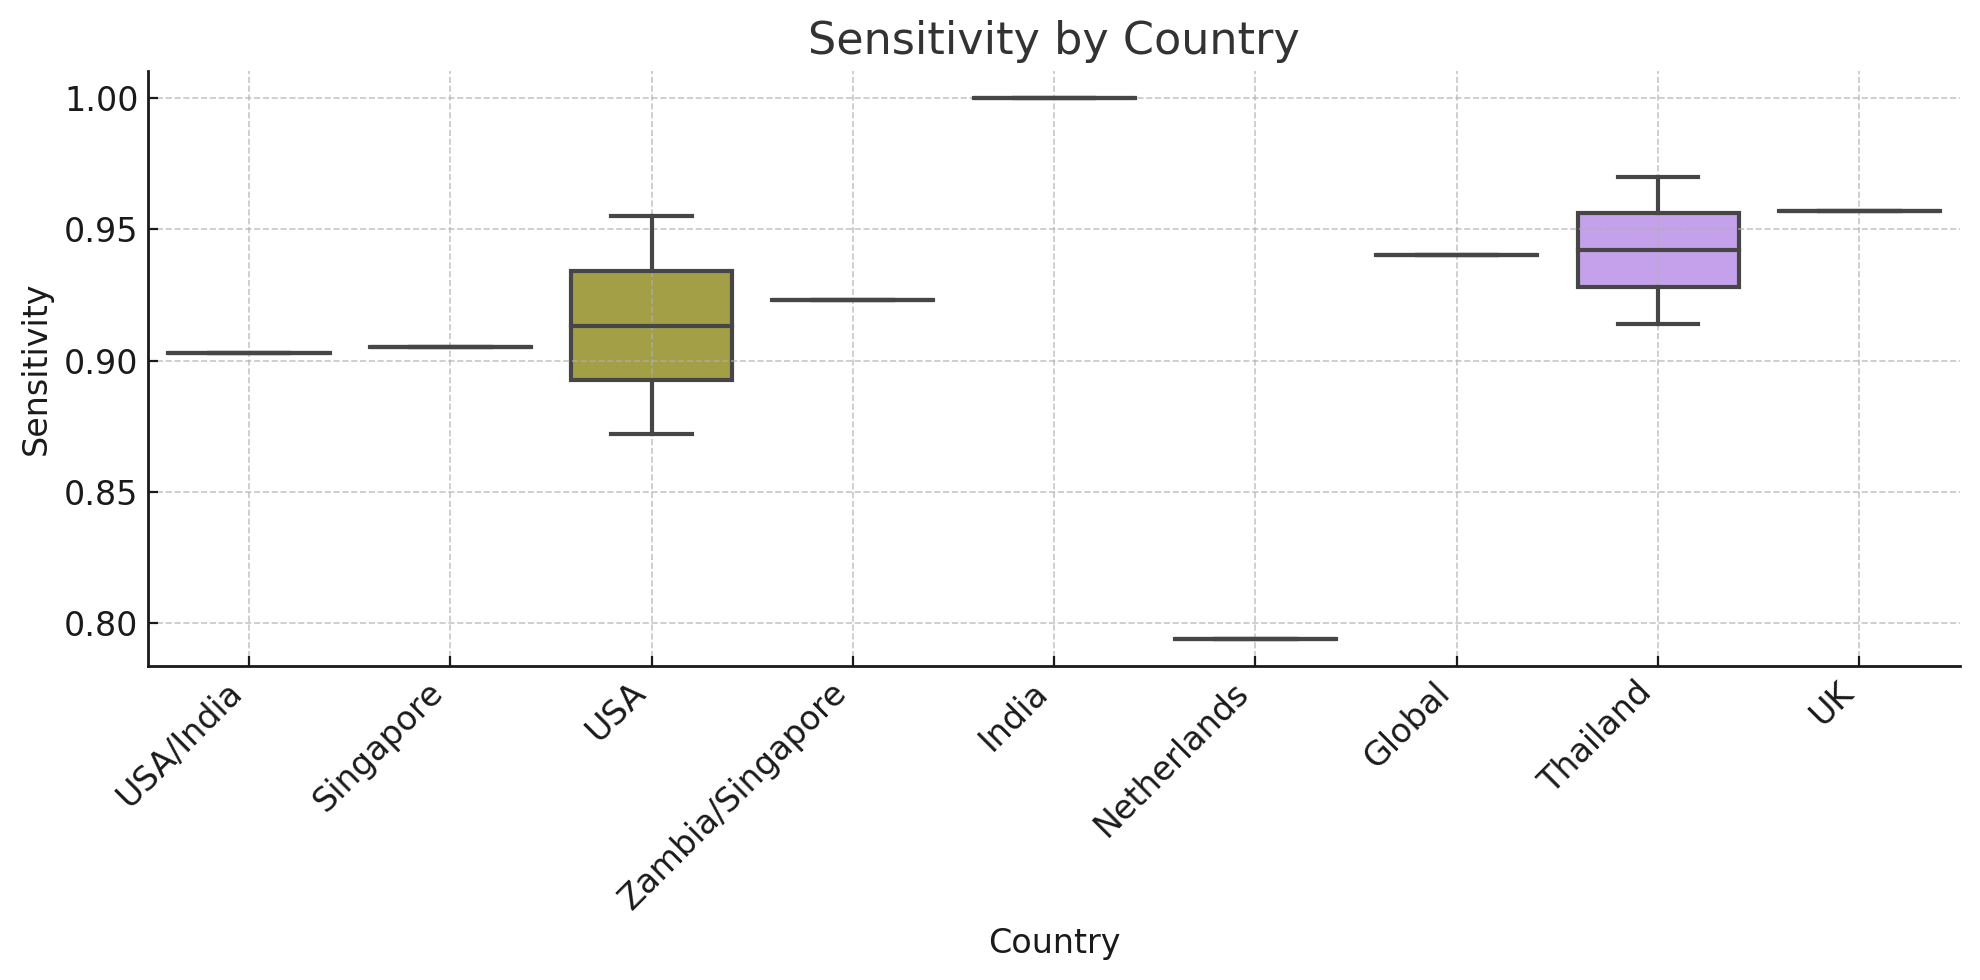


**Supplementary Figure S4**: Specificity by Geography (Country): Performance in Different Geographical Regions


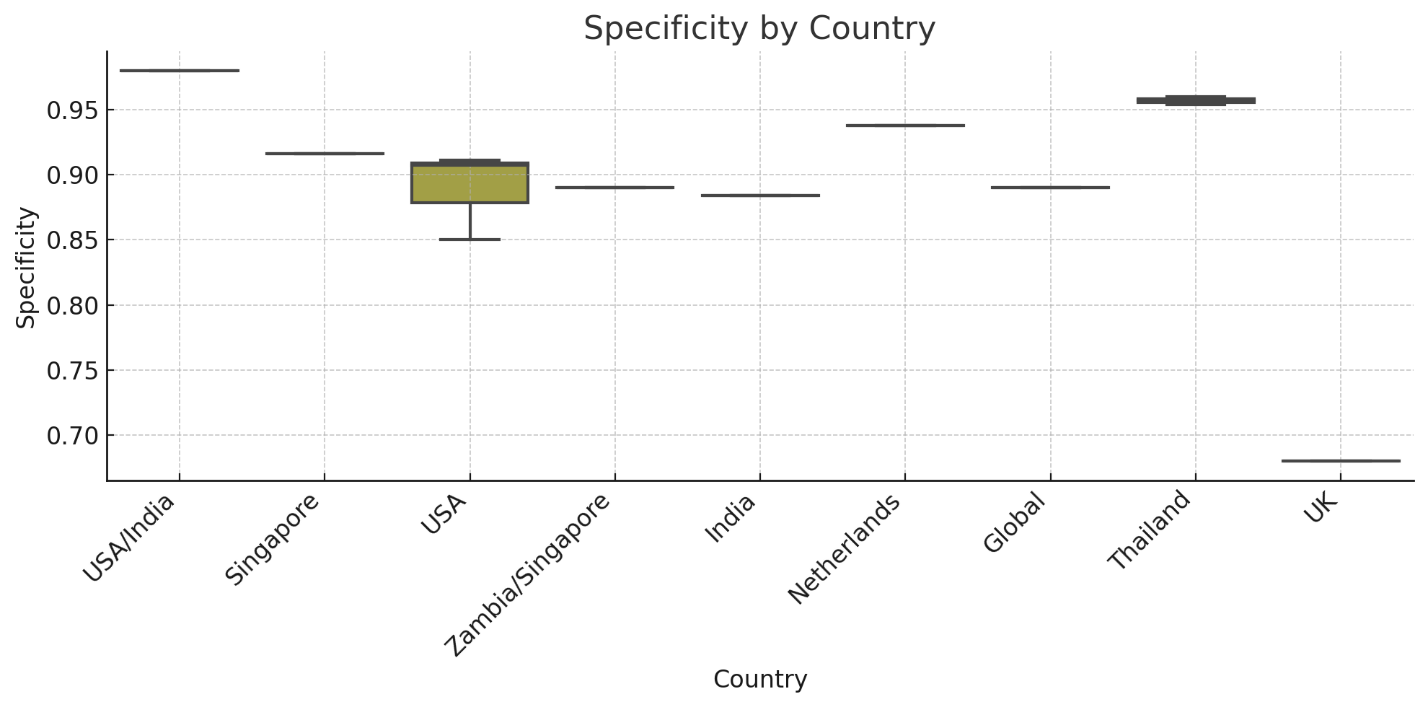


**Supplementary Figure S5**: Sensitivity by Image Quality Handling: Excluding, Retaining, or Referring Ungradable Images
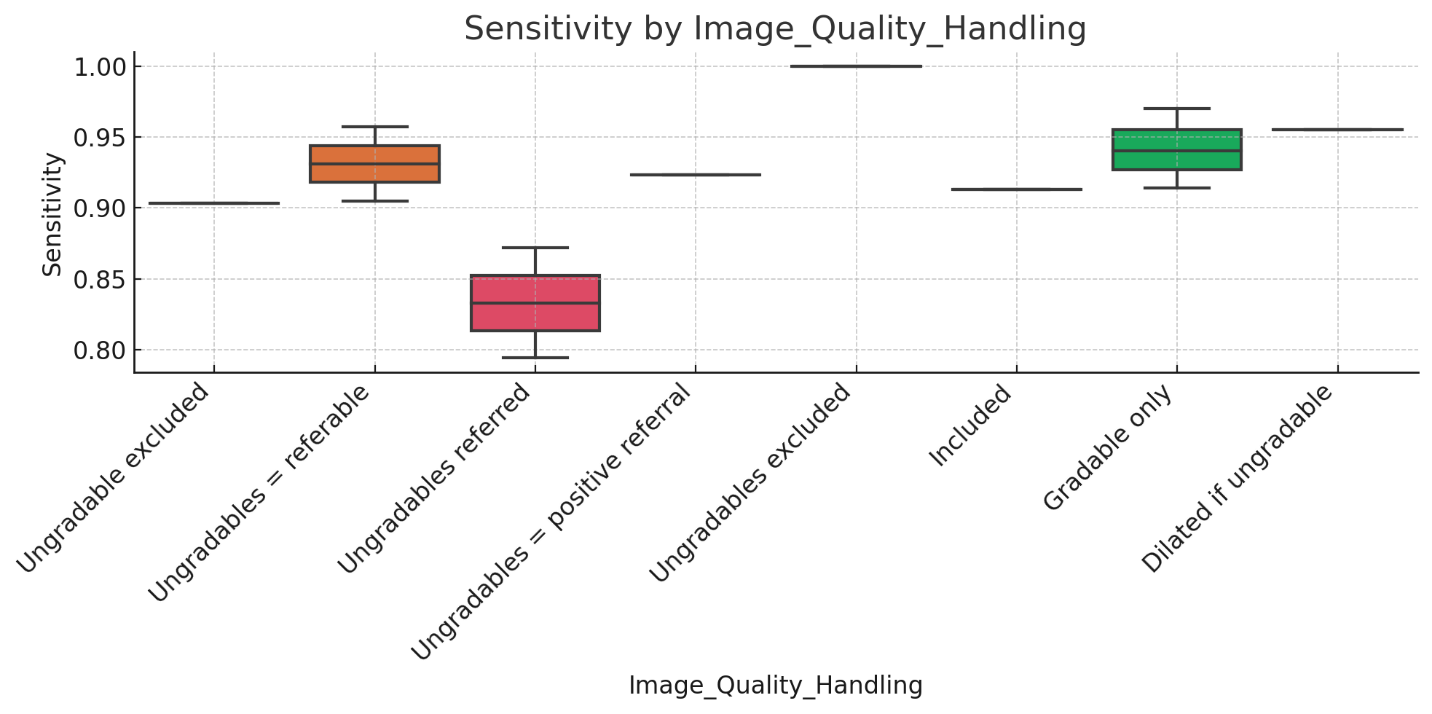


**Supplementary Figure S6**: Specificity by Image Quality Handling: Excluding, Retaining, or Referring Ungradable Images
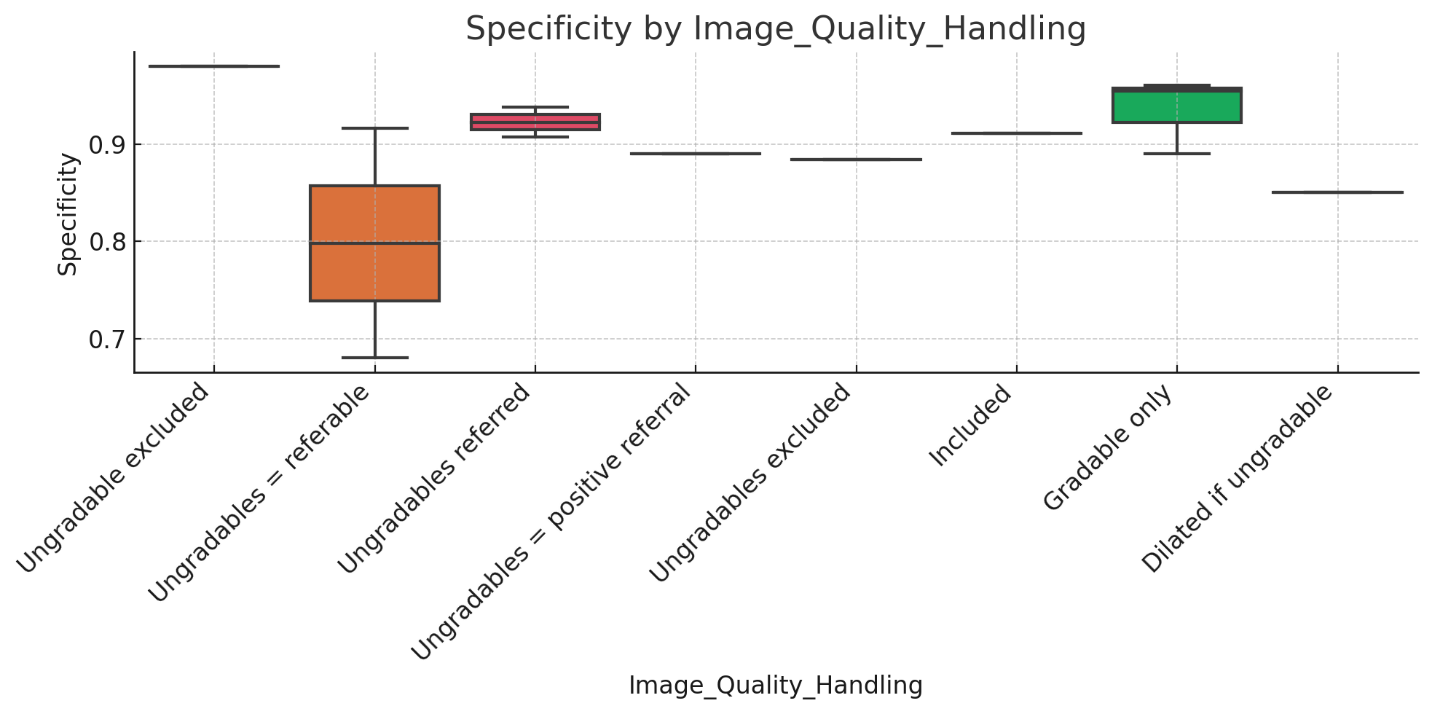


**Supplementary Figure S7**: Sensitivity by DR Severity Threshold: Performance of Models Targeting Vision-Threatening DR vs. Any DR


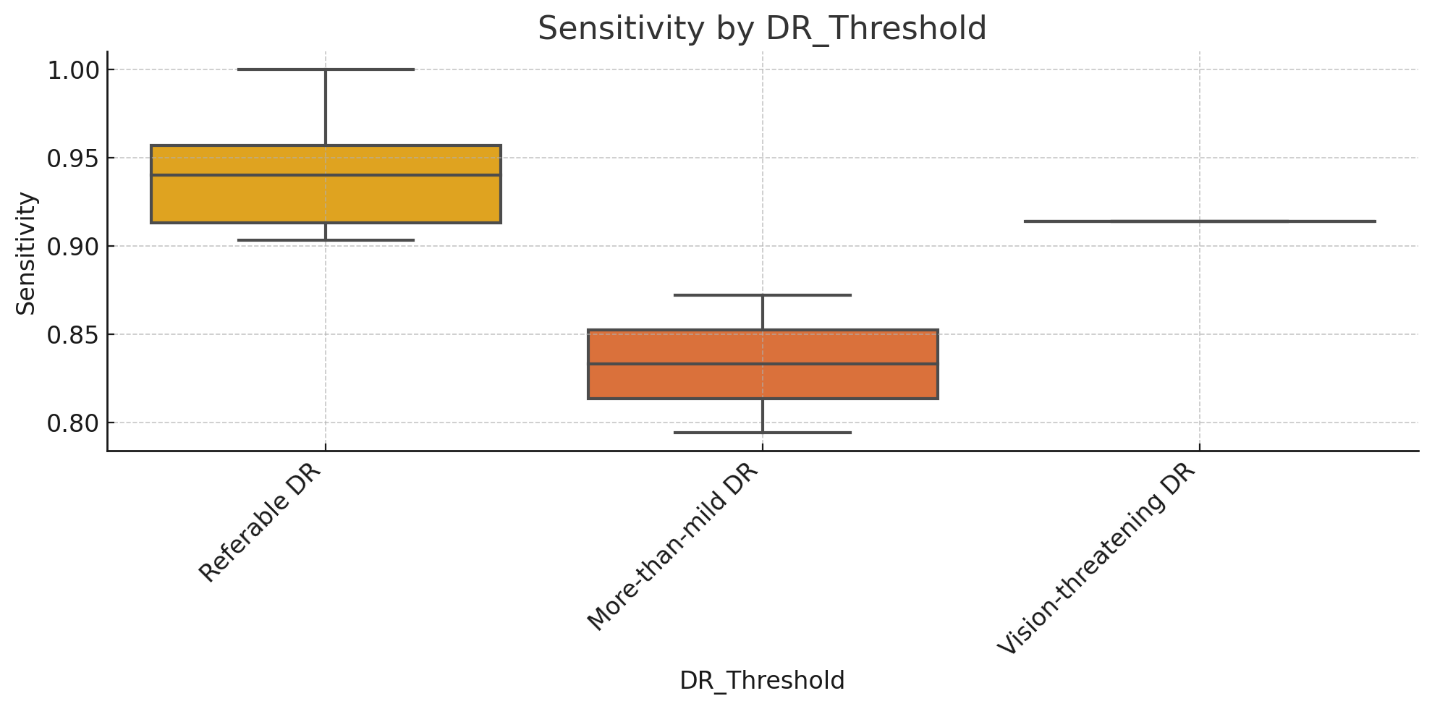


**Supplementary Figure S8**: Specificity by DR Severity Threshold: Performance of Models Targeting Vision-Threatening DR vs. Any DR


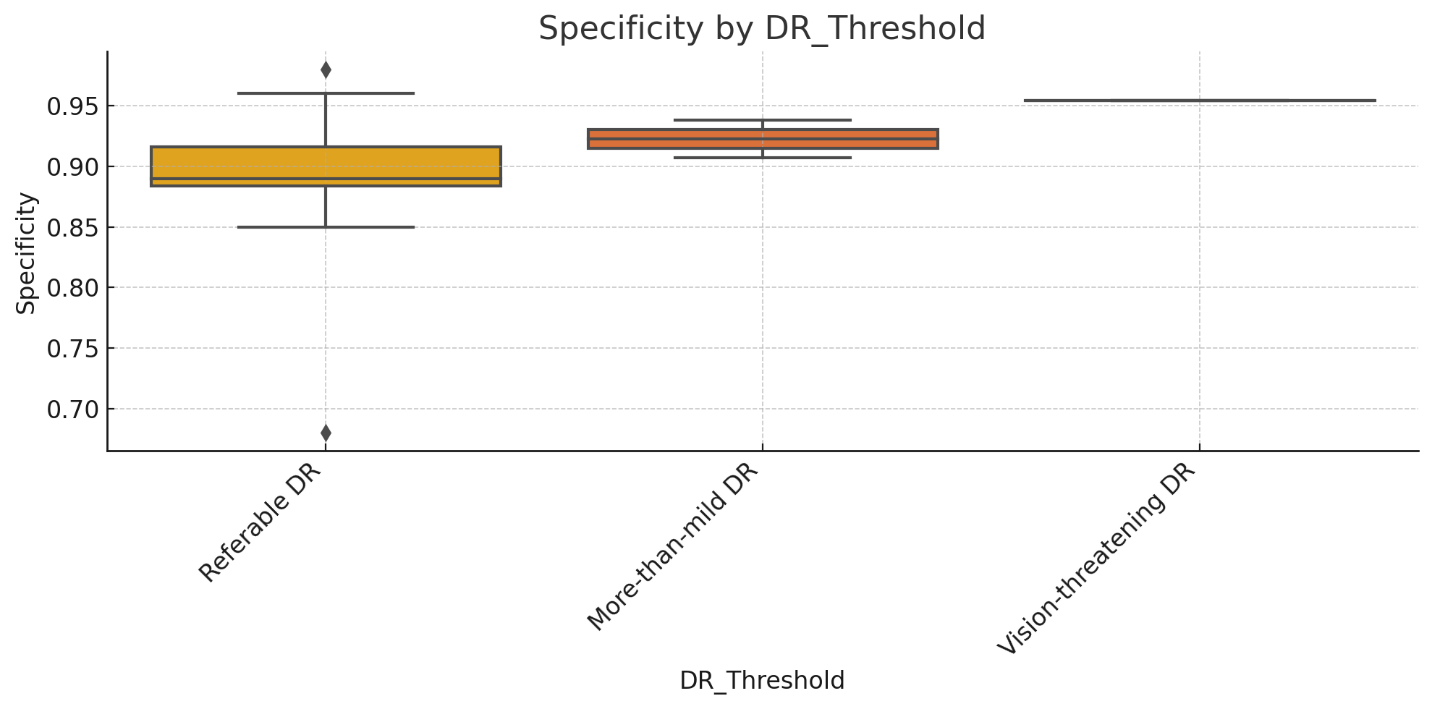


**Supplementary Figure S11**: Scatter Plot – Sensitivity vs. Year: Meta-Regression Analysis


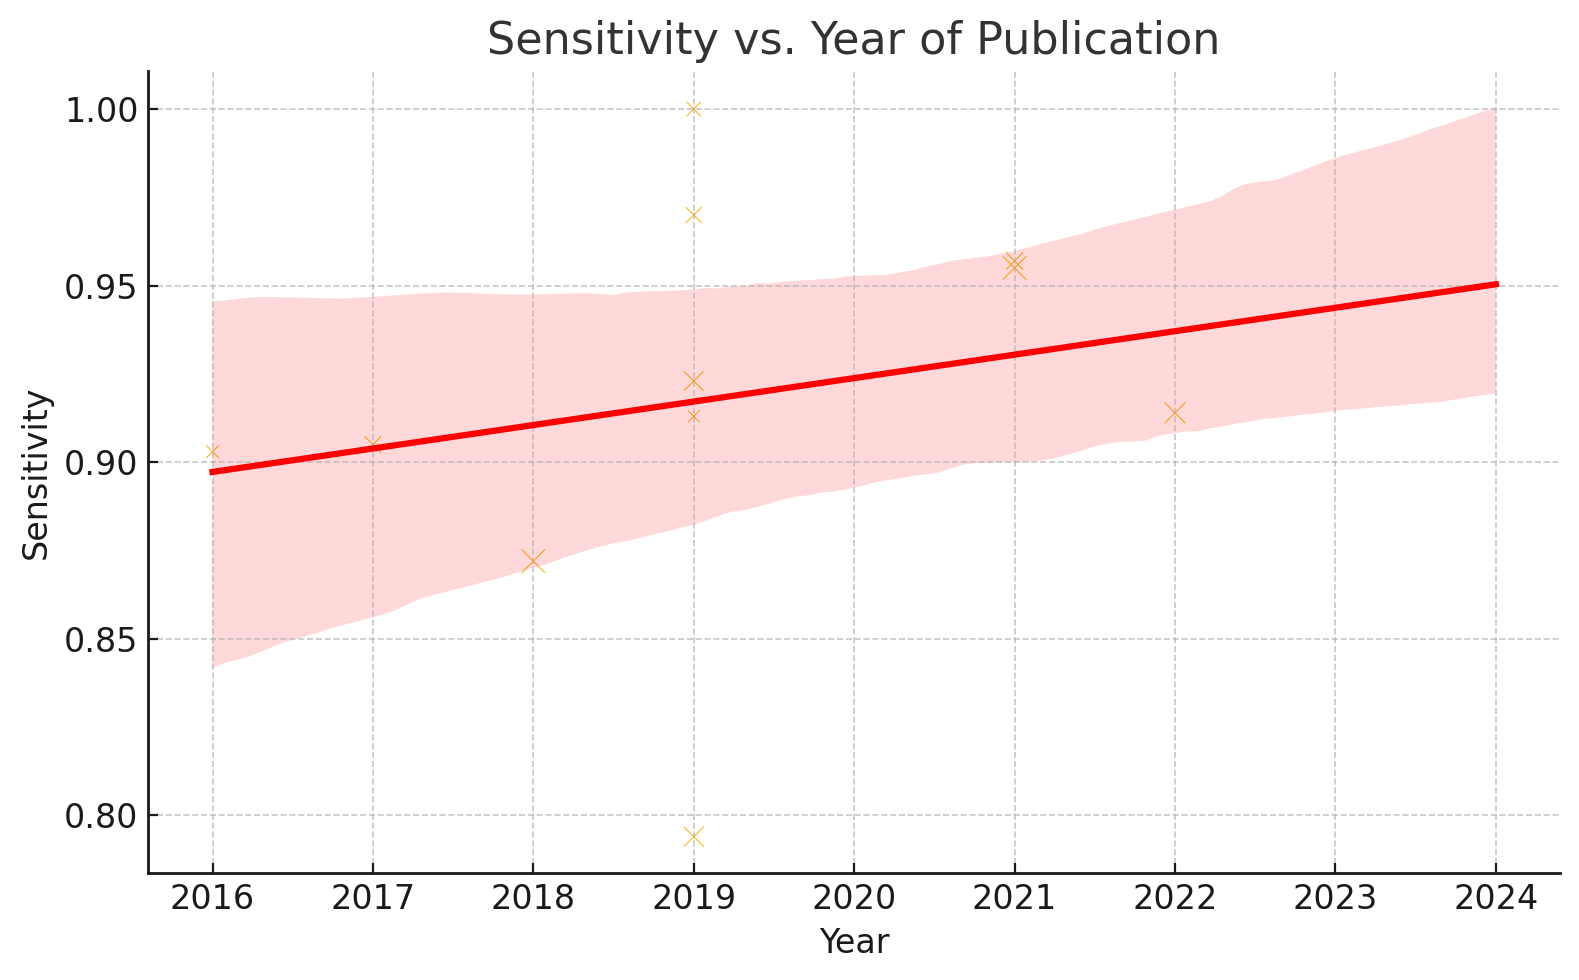


**Supplementary Figure S12**: Scatter Plot – Specificity vs. Year: Meta-Regression Analysis


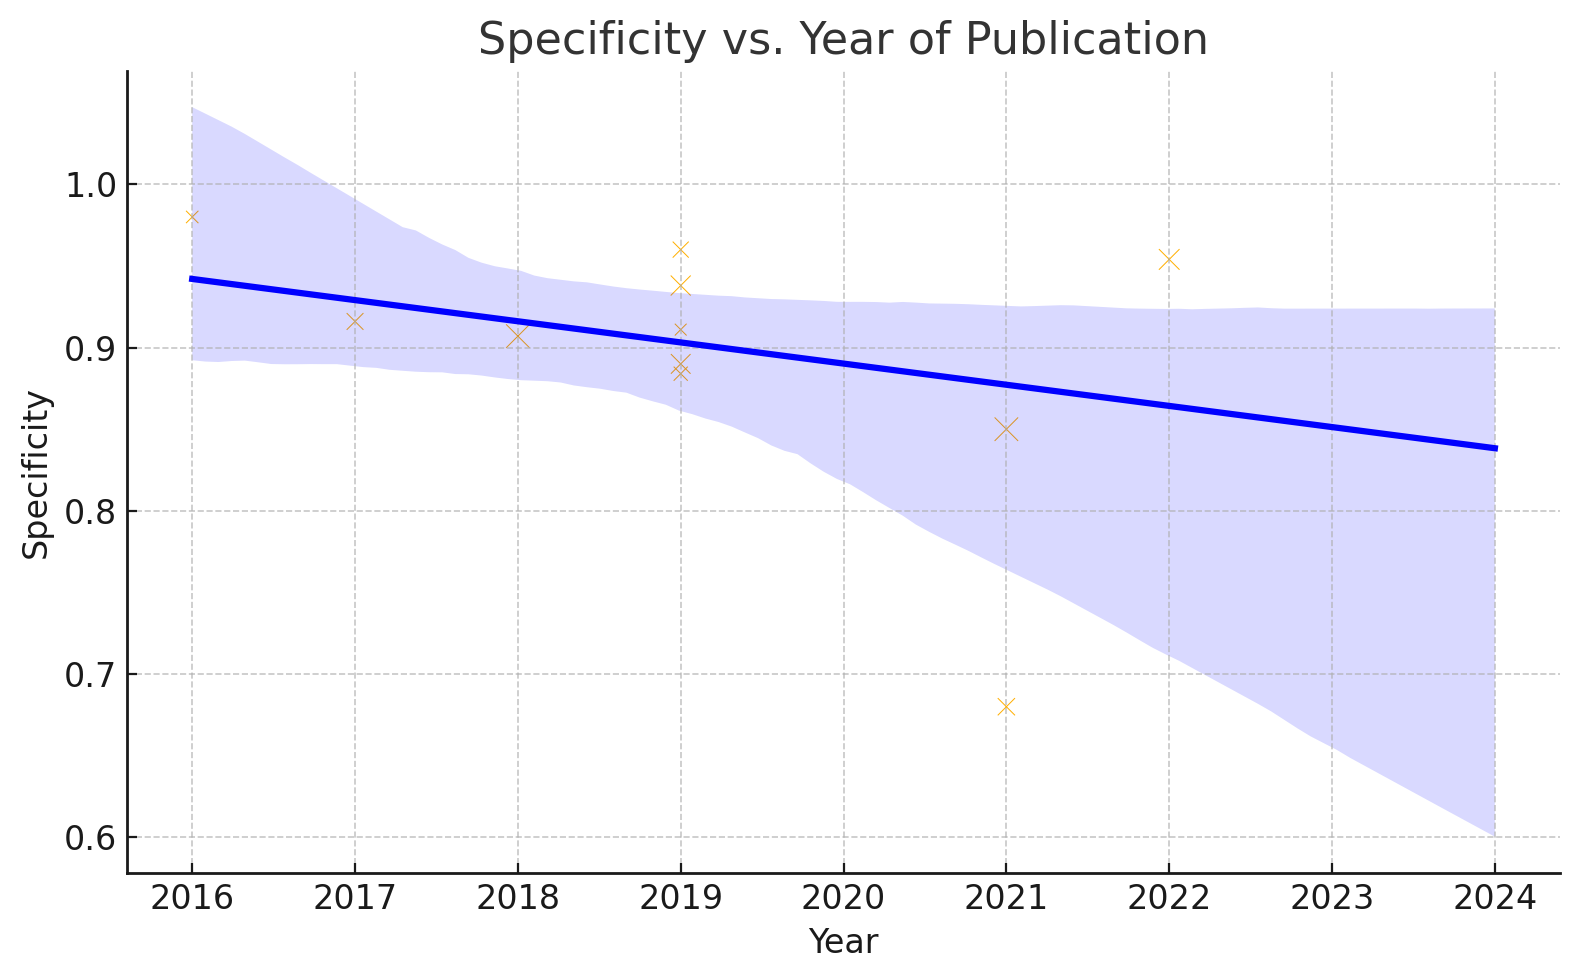


**Supplementary Figure S13**: Scatter Plot – Sensitivity vs. Sample Size: Meta-Regression Analysis


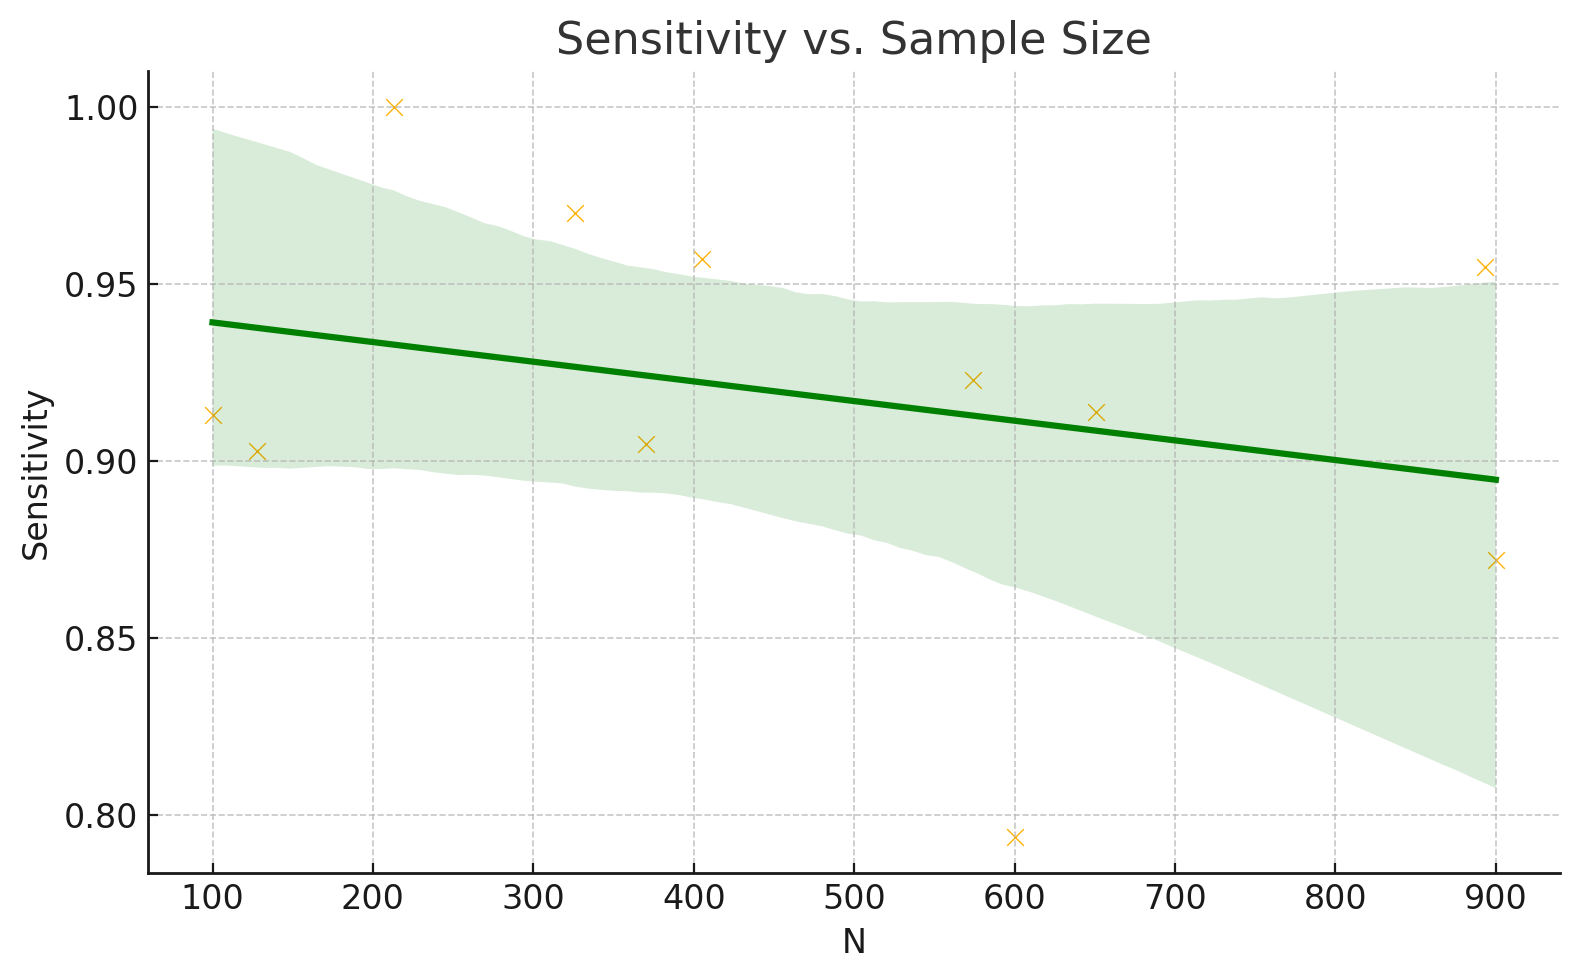

Supplement: Supplementary file 1 [file 16a730cff67a02193f8e79fe.docx]
